# Supplementary material for: Risk factor analysis for bone marrow histiocytic hyperplasia with hemophagocytosis: an autopsy study
Source: Springer Nature journal article supplement (doi:10.1007/s00428-014-1592-8), 2014-05-22
Supplement: MOESM1 [file 8497424]

**Supplemental Table 1. Detailed information of the underlying conditions in each patient**

| No | Age | Sex | HHH      | Bone marrow cellularity | Malignancy | Clinical diagnosis          | Major metastatic sites                                              | Major complication                | Sepsis | DIC | Shock |
|----|-----|-----|----------|-------------------------|------------|-----------------------------|---------------------------------------------------------------------|-----------------------------------|--------|-----|-------|
| 1  | 53  | F   | Hypo-    | Hypocellular            | +          | AML                         |                                                                     | sepsis (Fusarium, CMV, bacteria)  | +      | +   | -     |
| 2  | 56  | M   | Hypo-    | Hypocellular            | +          | AML                         |                                                                     | sepsis (fungus, CMV, bacteria)    | +      | +   | -     |
| 3  | 66  | M   | Hypo-    | Hypocellular            | +          | AML                         |                                                                     | lobal pneumonia                   | -      | -   | -     |
| 4  | 66  | F   | Hypo-    | Hypocellular            | +          | Malignant lymphoma          |                                                                     | sepsis, brain abscess (bacterial) | +      | +   | +     |
| 5  | 54  | M   | Hypo-    | Hypocellular            | +          | Malignant lymphoma          | brain, liver, spleen, kidney                                        | aspiration pneumonia              | -      | +   | -     |
| 6  | 78  | M   | Hypo-    | Hypocellular            | +          | Myelofibrosis               |                                                                     | pneumonia                         | -      | +   | -     |
| 7  | 59  | M   | Hypo-    | Hypocellular            | -          | Aplastic anemia             |                                                                     | TRALI                             | -      | +   | +     |
| 8  | 53  | M   | Hypo-    | Hypocellular            | -          | Massive ascites             |                                                                     | enterocolitis, pneumonia, sepsis  | +      | +   | -     |
| 9  | 75  | M   | Severe   | Hypercellular           | +          | AML                         | liver, spleen, adrenal gland, lymph nodes                           | pneumonia (Aspergillosis), sepsis | +      | +   | -     |
| 10 | 79  | F   | Severe   | Hypercellular           | +          | AML                         |                                                                     | infectious endocarditis, sepsis   | +      | -   | +     |
| 11 | 60  | F   | Severe   | Normocellular           | +          | Malignant lymphoma          |                                                                     | sepsis (CMV)                      | +      | +   | +     |
| 12 | 71  | M   | Severe   | Hypercellular           | +          | Malignant lymphoma          | bone marrow, liver, spleen, pancreas                                |                                   | -      | +   | -     |
| 13 | 76  | M   | Severe   | Hypercellular           | +          | MDS                         | spleen                                                              | pulmonary abscess, prostatitis    | -      | +   | -     |
| 14 | 65  | F   | Severe   | Normocellular           | -          | Microscopic polyangiitis    |                                                                     | sepsis (fungus)                   | +      | +   | +     |
| 15 | 55  | F   | Severe   | Normocellular           | +          | Ovarian cancer              | ovary, bladder, peritoneum                                          |                                   | -      | -   | -     |
| 16 | 64  | F   | Severe   | Hypercellular           | +          | External genital cancer     | skin, peritoneum, lymph nodes                                       | pneumonia                         | -      | +   | -     |
| 17 | 53  | M   | Severe   | Hypercellular           | +          | Rectal cancer               | brain, lung, liver, kidney, adrenal gland, skin, lymph nodes        |                                   | -      | -   | -     |
| 18 | 59  | M   | Severe   | Hypercellular           | +          | Bile duct cancer            | lung, pleura, liver, pancreas, peritoneum, bone marrow, lymph nodes |                                   | -      | -   | -     |
| 19 | 65  | F   | Severe   | Slightly hypercellular  | -          | Acute subdural hemorrhage   |                                                                     | pneumonia                         | -      | +   | -     |
| 20 | 53  | M   | Moderate | Hypercellular           | +          | AML                         | liver, spleen, kidney, testis                                       | sepsis, tumor lysis syndrome      | +      | +   | +     |
| 21 | 70  | F   | Moderate | Hypercellular           | +          | AML                         | liver, spleen, lymph nodes                                          | lobal pneumonia                   | -      | +   | -     |
| 22 | 68  | F   | Moderate | Slightly hypocellular   | +          | Gallbladder cancer          | brain, lung, liver, adrenal gland, lymph nodes                      | sepsis                            | +      | +   | -     |
| 23 | 91  | M   | Moderate | Normocellular           | -          | Hemorrhagic gastric ulcer   |                                                                     | sepsis                            | +      | -   | +     |
| 24 | 74  | M   | Moderate | Normocellular           | -          | Interstitial pneumonia      |                                                                     | interstitial pneumonia            | -      | -   | -     |
| 25 | 70  | M   | Moderate | Hypercellular           | -          | Liver cirrhosis             |                                                                     |                                   | -      | -   | +     |
| 26 | 69  | F   | Moderate | Normocellular           | +          | Colon cancer                | lung, diaphragm, liver, peritoneum, rectum                          | pyelonephritis, pneumonia, sepsis | +      | -   | -     |
| 27 | 59  | M   | Moderate | Normocellular           | +          | Colon cancer                | liver, peritoneum                                                   | pan-peritonitis, sepsis           | +      | -   | +     |
| 28 | 54  | F   | Moderate | Hypercellular           | +          | Breast cancer               | brain, lung, heart, liver, spleen, bone marrow, lymph nodes         | aspiration pneumonia              | -      | +   | -     |
| 29 | 83  | F   | Moderate | Normocellular           | +          | Gastric cancer              | lung, pancreas, colon, peritoneum, lymph nodes                      |                                   | -      | -   | -     |
| 30 | 73  | M   | Mild     | Hypercellular           | +          | AML                         |                                                                     |                                   | -      | -   | +     |
| 31 | 68  | F   | Mild     | Hypocellular            | +          | Malignant lymphoma          | skin, adrenal gland, lymph nodes                                    | pneumonia, acute tubular necrosis | -      | -   | -     |
| 32 | 70  | F   | Mild     | Hypercellular           | +          | Malignant lymphoma          | bone marrow, lung, liver, spleen, adrenal gland, kidney, uterus     |                                   | -      | +   | -     |
| 33 | 74  | F   | Mild     | Hypercellular           | +          | Malignant lymphoma          | brain, bone marrow, heart, lung, liver, spleen, kidney, bladder     |                                   | -      | +   | -     |
| 34 | 79  | F   | Mild     | Hypercellular           | +          | MDS                         | heart, lung, esophagus, liver, spleen, kidney, lymph nodes          |                                   | -      | +   | -     |
| 35 | 56  | M   | Mild     | Hypercellular           | +          | Gall bladder cancer         | lung, liver, spleen, peritoneum, adrenal gland, lymph nodes         | pneumonia (fungus)                | -      | +   | -     |
| 36 | 79  | M   | Mild     | Hypercellular           | +          | Lung cancer                 | bone marrow, pleura, kidney, adrenal gland, skin, lymph nodes       | pneumonia                         | -      | -   | -     |
| 37 | 53  | M   | Mild     | Normocellular           | -          | Hypertrophic cardiomyopathy |                                                                     | prostatitis                       | -      | -   | -     |
| 38 | 79  | M   | Mild     | Normocellular           | -          | Pneumonia                   |                                                                     | pneumonia                         | -      | -   | -     |

|    |    |   |      |                        |   |                           |                                                                       |                           |   |   |   |
|----|----|---|------|------------------------|---|---------------------------|-----------------------------------------------------------------------|---------------------------|---|---|---|
| 39 | 63 | M | Mild | Normocellular          | + | Hepatoma                  | lung, adrenal gland                                                   |                           | - | - | + |
| 40 | 74 | F | Mild | Normocellular          | + | Ovarian cancer            | lymph nodes                                                           | pneumonia                 | - | - | - |
| 41 | 52 | M | Mild | Normocellular          | + | Gingival cancer           | lung, lymph nodes                                                     | pulmonary abscess         | - | - | - |
| 42 | 71 | M | Mild | Normocellular          | + | Glioblastoma              |                                                                       | pneumonia                 | - | - | - |
| 43 | 85 | F | Mild | Hypercellular          | + | Cervical cancer           | bladder                                                               |                           | - | - | - |
| 44 | 73 | M | -    | Normocellular          | + | Lung cancer               | lung                                                                  | sepsis (MRSA)             | + | + | + |
| 45 | 71 | M | -    | Hypercellular          | + | Lung cancer               | lung, liver, bone marrow, adrenal gland, kidney, lymph nodes          | acute tubular necrosis    | - | + | - |
| 46 | 90 | F | -    | Hypercellular          | + | Colon cancer              | lymph nodes                                                           | pneumonia, pyelonephritis | - | - | - |
| 47 | 87 | F | -    | Normocellular          | + | Pancreas cancer           | bile duct, duodenum                                                   |                           | - | + | - |
| 48 | 50 | M | -    | Hypocellular           | + | Hepatoma                  |                                                                       |                           | - | - | + |
| 49 | 81 | M | -    | Hypocellular           | + | Hepatoma                  |                                                                       |                           | - | - | + |
| 50 | 0  | M | -    | Normocellular          | - | Infectious enteritis      |                                                                       | sepsis (Acinetobacter)    | + | - | + |
| 51 | 76 | F | -    | Normocellular          | - | Diabetes mellitus         |                                                                       | tuberculosis, colitis     | - | + | - |
| 52 | 84 | M | -    | Normocellular          | - | Viral pneumonia           |                                                                       | pneumonia (CMV)           | - | + | - |
| 53 | 42 | F | -    | Hypercellular          | - | MELAS                     |                                                                       | pneumonia                 | - | + | - |
| 54 | 52 | F | -    | Normocellular          | - | MELAS                     |                                                                       |                           | - | + | - |
| 55 | 51 | M | -    | Normocellular          | - | Alcoholic liver cirrhosis |                                                                       |                           | - | + | + |
| 56 | 68 | M | -    | Hypocellular           | - | Diabetes mellitus         |                                                                       |                           | - | - | - |
| 57 | 94 | F | -    | Normocellular          | - | Pneumonia                 |                                                                       |                           | - | - | - |
| 58 | 68 | M | -    | Normocellular          | - | Diffuse panbronchiolitis  |                                                                       |                           | - | - | - |
| 59 | 42 | M | -    | Normocellular          | - | Osteochondrodysplasia     |                                                                       |                           | - | - | - |
| 60 | 65 | F | -    | Normocellular          | + | Pharyngeal cancer         |                                                                       | sepsis                    | + | - | - |
| 61 | 67 | M | -    | Slightly hypercellular | + | Hypopharyngeal cancer     | lung, liver, lymph nodes                                              | sepsis                    | + | + | + |
| 62 | 74 | F | -    | Slightly hypercellular | + | Renal cancer              | brain, bone marrow, liver, spleen, kidney, adrenal gland, lymph nodes | pneumonia                 | - | - | - |
| 63 | 87 | F | -    | Normocellular          | + | Cervical cancer           | en bloc of pelvic organs                                              | pneumonia, pyelonephritis | - | - | - |
| 64 | 81 | M | -    | Hypercellular          | + | Lung cancer               | bone marrow, lung, liver, lymph nodes                                 | aspiration pneumonia      | - | - | - |
| 65 | 52 | F | -    | Hypercellular          | + | Colon cancer              | bone marrow, lung, liver, adrenal gland, kidney, lymph nodes          | pan-peritonitis           | - | - | - |
| 66 | 78 | M | -    | Hypercellular          | + | Gastric cancer            | peritoneum                                                            |                           | - | - | - |
| 67 | 64 | M | -    | Hypercellular          | + | Gastric cancer            | bone marrow, lung, liver, duodenum, lymph nodes                       |                           | - | - | - |
| 68 | 74 | F | -    | Normocellular          | + | Ovarian cancer            | peritoneum                                                            |                           | - | - | - |
| 69 | 35 | M | -    | Hypercellular          | - | Infectious endocarditis   |                                                                       | sepsis                    | + | + | - |
| 70 | 73 | F | -    | Normocellular          | - | Subarachnoid hemorrhage   |                                                                       | pneumonia                 | - | - | - |

Abbreviations; AML; acute myelocytic leukemia, CMV; cytomegalovirus, MDS; myelodysplastic syndrome, MELAS; myopathy, encephalopathy, lactic acidosis and stroke-like episode, MRSA; methicillin-resistant staphylococcus aureus, TRALI; transfusion-related acute lung injury
